# Supplementary material for: The genome of Bifidobacterium pseudocatenulatum IPLA 36007, a human intestinal strain with isoflavone-activation activity
Source: PubMed Central journal article supplement (PMC4121622; doi:10.1186/1757-4749-6-31), 2014-07-23
Supplement: 1757-4749-6-31-S1.pdf [file 1757-4749-6-31-S1.pdf]

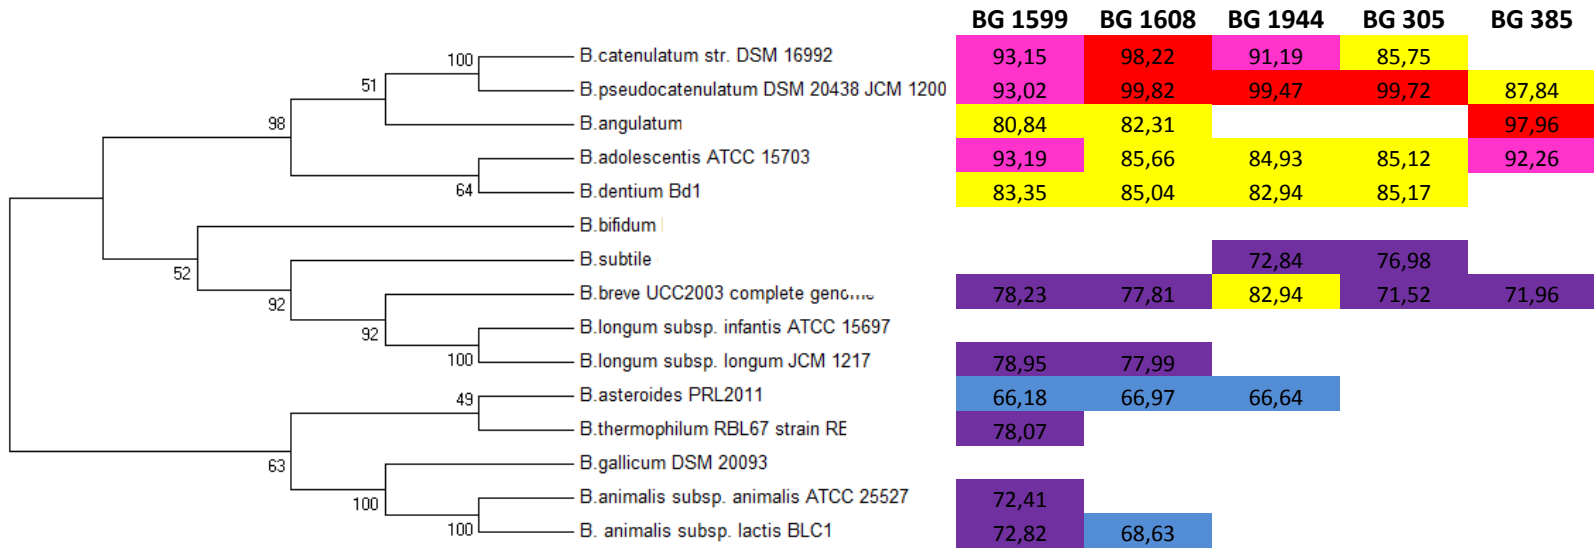

**Supplementary Figure 1.** Multiblast analysis of putative  $\beta$ -glucosidases from *Bifidobacterium pseudocatenulatum* IPLA 36007 to those on the genomes of other bifidobacteria in the databases.
